# Supplementary material for: A systemic and comprehensive assessment of coastal hazard changes: method and application to France and its overseas territories
Source: Copernicus journal article supplement (doi:10.5194/nhess-2023-154), 2023-08-30
Supplement: Supplementary file [file nhess-2023-154-AC2-supplement.pdf]

# Answers to the Review Report for NHESS-2023-154

## 1 Overall assessment

The paper titled "A systemic and comprehensive assessment of coastal hazard changes: method and application to France and its overseas territories" is an attempt to, as the title suggests, systemic (e.g., coast as a system) and comprehensive assessment of coastal hazard change (in the context of climate change). The paper goes long discussion about its method, then appears to pull observation from some available repositories (in France), pull climate projection from other studies and proposes to provide a systemic (or systematic?) and comprehensive assessment of coastal hazard changes. The final result boils down to a table of regions where qualitative/quantitative measurements from the above-mentioned data are put together, and a mixture of subjective and objective opinion is provided.

The main contribution of the paper is the proposed **method**, not the results obtained in the case study. If these results, considered separately or jointly, are also of intrinsic interest, they are mainly presented to demonstrate the interest of our method.

The objective of this paper is ambitious, and necessary in the context of the risk of multiple coastal hazards, and their unknown/uncertain evolution in the changing climate. I would like to thank the authors to take time to work on this topic. However, unfortunately, after reading the manuscript, I was left with a hollow impression. At the current condition of the manuscript, I do not recommend it's publication in NHESS, and my decision would be to reject.

We hope that the adaptations we propose below in response to your comments will help to better highlight the contributions and clarify the objectives of our article.

Although we have not tried to make a significant contribution to the quantitative evaluation of the physical phenomena, including extreme water levels and their frequencies, we think that our method of evaluating the evolution of the hazard with a more global approach is still of real interest. The concepts of risk and hazard are at the heart of our reflection, and the apprehension of the hazard for complex systems like the Earth are possible, in our opinion, only if systemic approaches complement the analytical approaches (deterministic or probabilistic). We thus feel like this paper is appropriate for a journal that aims to « embrace a holistic Earth system science approach ».

## 2 Reasoning for the decision

Despite my negative decision, below I have tried to provide a relatively broad reasoning of my decision and some ways the work can be improved (in my opinion). I have also marked some smaller matter in the line-by-line comments. I hope it helps the authors to rethink about their approach, analysis, and presentation.

Thank you for clarifying the reasons for your suggestion to reject the paper. Below are our answers.

We also thank you for reviewing the document line by line, as these detailed comments will improve the paper on most of the points you report to us.

The first one is regarding the physics, and the referencing of the existing knowledge of the physical processes that constitute the hazard. There are countless profound claims regarding storm surge characteristics, tide-surge interactions, contribution of wave setup, link between shoreline and hazard and many more are written, but for which very little or often no reference are provided. For each region

in France, for practically each component of hazard in question, there are many available literature that should be cited, but it was not the case. Particularly, the consideration of wave is very highlighted in this paper as a novelty. However, the well outdated (and overused) eqn. of  $0.2 H_s$  [1] is too oversimplification of an important factor. One way-around would be to get the best assessment from available studies regarding the scaling, if not there are already existing literature that proposes alternative beach-slope dependent formulations (e.g., [2]). The non-linear interaction between various components - tide, surge, wave-setup are now well established (e.g., [3]) and needs to be well thought too.

The first reference you cite (Aucan et al., 2018) notes the importance of the effect of waves on the sea level. However, our objective is not to evaluate the evolution of a parameter at a precise time, but to improve the overall assessment of coastal hazards in the long term, taking into account that this assessment is carried out using hypothetical scenarios and that there are high uncertainties related to the multiple factors determining the hazard, which are reinforced by the interactions between these factors. In this context, the precise calculation of the effect of waves on the sea level is of relative importance. In particular, concerning the wave set-up estimate, line 172 stated:

«  $0.2 H_s$  is a generic approximation of the wave set-up (U.S. Army Corps of Engineers, 2002). This equation is a conservative estimate of the wave set-up, which mostly depends on the local slope, breaking wave height, and wave period, and may be closer to 10% of the breaking wave height. Larger values may only be observed at steep sandy beaches (e.g. Martins et al., 2022) or steep shore platforms (Sheremet et al., 2014; Lavaud et al., 2022). This expression is used here since the objective of this work is not to improve existing deterministic methods, but to present a systemic and comprehensive method for assessing the evolution of coastal hazards. »

The method for estimating sea levels is given by default and, if desired, the user of the method can produce other estimates. This position may be justified as follows by completing the introduction of Part 2, with three new paragraphs starting with line 142 (and replacing the last sentence of the paragraph) :

**« For the assessment of sea levels, Table 1 shows the projections for the GMSL under the SSP5-8.5 scenario at three time scales: 2050, 2100 and 2300.**

| climate scenario | 2050 Median | 2050 17-83% range | 2100 Median | 2100 17-83% range | 2300 Median | 2300 17-83% range |
|------------------|-------------|-------------------|-------------|-------------------|-------------|-------------------|
| SSP5-8.5         | + 32 cm     | 23 cm to 40 cm    | + 84 cm     | 61 cm to 110 cm   | +385 cm     | 230 cm to 540 cm  |

**Table 1: GMSL projections for 2050, 2100 and 2300 for the SSP5-8.5 scenario. Median values and ranges for the 17th to 83rd percentiles are shown using the 1986-2005 period as a reference (IPCC, 2019).**

The GMSL values displayed in Table 1 show high uncertainties in the long term. For example, in 2100, the median value is 0.84 m and the 17th to 83rd percentile range is 0.61 to 1.10 m (the high value is almost double the low value). These GMSL estimates were established for the SSP5-8.5 scenario, but greater differences exist if other scenarios are considered in a complementary manner. Similar (or higher, since other local phenomena must be considered) uncertainties exist for the RSL and the centennial ESL.

In conclusion, it is clear that for long-term adaptations, a general description of the evolution of the hazard, including the estimated uncertainties, is more appropriate than a forecast (likely imprecise)

of the evolution of a parameter at a given date. Accordingly, in this method, we will use conservative assumptions when assessing sea level components. »

In complement:

At line 157, we will refer to Aucan et al. (2018) and Gomes da Silva et al. (2020) to justify that we do not take wave run-up into account in our method for regional studies.

On line 167, equation (3) will be followed by this comment :

« Given the strong uncertainties concerning the long-term evolution of the RSL and the geomorphological changes, in the general case it is not strictly necessary, within the framework of this method intended to comprehensively understand coastal hazard changes, to propose a more sophisticated method for estimating ESLs than that proposed by Vousdoukas et al. (2018). Nevertheless, the user of the method should evaluate the advantages of applying another formula if it seems preferable for a particular case study. In particular, Idier et al. (2019) established that in shallow water non-linear interactions between various components - tide, surge, wave set-up can reach several tens of centimeters (on the contrary, non-linear interactions are negligible in deeper areas). A new generation Global Tide and Surge Model Version 3.0 (GTSMv3.0) was recently developed. GTSMv3.0 can now be used to dynamically simulate tides, storm surges, and changes in MSL, including interaction effects (Muis et al., 2020). »

Please note that advances in modelling are rapid. While our case studies do not take into account the latest modelling developments, if necessary our method can integrate the results provided by the new models.

On line 173, after equation (4), we will refer to Stockdon et al. (2006) that propose an alternative beach-slope dependent formulation.

On line 175, we propose to replace the sentence:

« This expression is used here since the objective of this work is not to improve existing deterministic methods, but to present a systemic and comprehensive method for assessing the evolution of coastal hazards. »

By:

« In the current state of the art, numerical simulations of set-up have been carried out only locally (e.g., Lange et al. (2021), van Ormondt et al. (2021)). Such retrospective simulations are computationally expensive (e.g. to simulate accurately set-up, and depending on the local bathymetry and alongshore variations in the wave field, a resolution of ~10-50 m may be needed). In addition : (i) accurate and high resolution wave setup needs good bathymetric data (Stephens et al., 2011) and these are not available in the spatial scales of the study ; (ii) Significant morphological changes are expected in nearshore areas, especially under a rising sea level. Such changes, especially for sandy beaches exposed to waves, can have a significant effect on the wave set-up at different timescales (Ruggiero et al., 2001 ; Thiébot et al., 2012 ; Brivois et al., 2012). Thus, at large spatial (e.g. global) and long temporal (e.g. 21st century) scales, simplified models that like of Vousdoukas et al. (2018) may provide a first estimate of the expected wave set-up. »

We feel as though the work of Vousdoukas et al. (2018) framework is an appropriate choice for the desired spatial and temporal scales in this study.

*For the overseas areas of France, there are excellent paper exists that uses sophisticated modelling with thousands of cyclones to quantify hazards (e.g., [4, 5]) - they are needed to be consulted. In broader sense, much more effort must be given to harvest the existing knowledge, particularly over France, the case-study of this paper.*

In principle, since we defend a systemic approach in addition to the analytical approach, our method should promote the use of all the knowledge available in a territory. We will therefore include additional relevant references in the case studies (these references are presented in our responses to your detailed comments). You will understand however that our first intention for the presentation of the nine case studies, is to show the form that can take the results (our second intention is to show the differences that may appear in the results obtained on the different sites).

*Secondly, The organisation of the paper is odd. The method section (section 2) is very long, with a lot of reasoning (which reads like a discussion rather than a method), and always referring to things in France - the study area - which is actually presented afterwards (section 3). It appears like, although I hope my guess is wrong, that the paper was first drafted for France, and then it was re-organise to present as a globally applicable method with an application to France. As such, if the Section 3 and Section 2 are switched, the text makes more sense.*

Since the primary objective of the paper is to present a method, section 2 is devoted a detailed presentation of the approach, explaining the underlying concepts (that of risk in particular) and the assessment principles (qualitative systemic approach to accompany the quantitative analytical approach, how to take into account the high uncertainties generated by climate change on the various components of the hazard).

The order and format of presentation of the data associated with the different sites is an integral part of the application of our method. Therefore, it is necessary to maintain the structure of the article "introduction - method - data of study sites and results - discussion - conclusion", even if a plan "introduction - data of study sites - method - results - discussion - conclusion" would have been possible without this constraint.

In response to your comment (and the comments of the first reviewer), we will present the method more concisely. These changes will reduce the number of references to metropolitan France (only one reference will remain (line 215)) and rebalance with references to other regions of the world (e.g. West Indies (line 222), United States (line 223), La Reunion (line 228), Polar regions (line 253)).

*Finally, for a paper this ambitious, no data analysis is done, most of the figures are off-theshelves, and most of the results are table, which are not often compact, with repeated results. I was looking for a map that summarises these coastal hazards over France, but it was disappointing to not find one.*

To give all the necessary follow-up to this comment (and the previous one), we propose to replace the last two paragraphs of the introduction (line 90-99) with the following paragraphs which specify the objectives of the study and its protocol of elaboration:

**« The objective of this paper is to present a comprehensive method to assess the evolution of coastal hazards at regional scales in the context of climate change. The proposed systemic method emphasizes the need to focus on the analysis and interpretation of the modelling results, by putting them into perspective with respect to the biophysical conditions (both current and forecasted).**

**The development of the method is the result of an empirical process, considering diverse situations. This process has the advantage of demonstrating the wide applicability of the proposed method. The case studies used to develop the method are all in France and French territories, but are located in different latitudes (equator, tropics and temperate zones), exposed to different climates, and characterized by different geomorphological configurations (including continental or island). It therefore becomes necessary to consider the qualitative « additional factors » proposed in the method that make it possible to assess the evolution of hazards on most coastlines in the world.**

**For the same purpose of ensuring that the method can be applied for operational purposes, the use of freely accessible data has been promoted. However, applications of this method should include a thorough bibliographic analyse or even additional investigations at the chosen case study sites. It is important to emphasize here that the application of the method depends strongly on the available data, and therefore it is necessary to gather the best data for each site. Since the quantity and quality of data is not the same everywhere, the uncertainties in the results will also vary, and must be addressed.**

**Following the application of the method to the nine case studies, the obtained results can contribute to improving predictions of the evolution of different types of coastal hazards (shoreline erosion, rapid submersion and/or permanent flooding). »**

In addition, we can merge and refine some tables to present the data in a more compact format (see our responses to your detailed comments).

Regarding the representation of the evolution of hazards in France and French territories in the form of a map, this would not bring additional information compared to the text, in particular since regional hazard analyses should extend to the local scale, as indicated in Section 4.

*One approach, that might be of interest for the further development of this paper, would be to do a consensus based assessment, where all the contributing factors listed in this paper are assessed based on existing literature. From there to find how consensus the results are - e.g., IPCC approach. Then, how this consensus differs from the results of the current study - which will potentially identify the research gaps in this line of study.*

Extending the research by the consensus method could be interesting, provided that consensus can be reached, which is not obvious given the diversity of coastal contexts. In all cases, we cannot present in the same paper both our method developed on an empirical basis and other methodological principles developed by consensus. On this point, **we propose to include in the conclusion as a research perspective your suggestion of a consensus evaluation based on bibliographic studies on each of the determining factors.**

Note that two questions you ask in the detailed comments are fundamental for our paper:

-in line 40 : *Why ESL is not sufficient to describe the evolution of the coastal hazards?*

-in line 250-252 : *How does these sentences [relative to the functional collapse of coral reefs] fit to the current discussion of hazard ?*

We plan to respond to this in the introduction of the paper, starting at line 45 (where you correctly pointed out that a transition was missing):

**« To answer this problem [hazard cannot be represented by a single parameter: the maximum water level reached during an event], it should first be recalled that during a metocean event, the phenomena of flooding and coastal erosion are not only determined by the maximum sea level, but also by coastal waves and currents, and overtopping and overflow discharges over flood protection structures (Formentin et al., 2018; Iggibel et al., 2022). Estimating these discharges and hydrodynamic conditions for the duration of an event requires a good understanding of the physical phenomena that generate the hazard. Retrospective analyses of events help to understand correctly the mechanisms that cause the observed flooding or erosion. For example, by simulating Total Water**

Levels (TWLs) along the Bight extending from North Carolina to Florida during three historical Tropical Cyclones (TCs) with similar tracks, Hsu et al. (2023) found that the magnitude and duration of the increase in TWLs and wind waves are influenced by TC intensity, translational speed and distance from shore. In particular, these authors established that a decrease in TC translation speed led to longer exceedance durations of TWLs, which may result in higher impacts.

Unfortunately, it is not possible to predict the physical characteristics of future events, nor to assess corresponding hydrodynamic conditions. To compensate for this, probabilistic approaches have been developed. For example, using a large number of synthetic hurricanes that consider the natural variability in hurricane frequency, size, intensity and track, Krien et al. (2015) infer for the archipelago of Guadeloupe 100-year and 1000-year surge levels. Following the same principle, Krien et al. (2017) estimate 100-year surge levels in Martinique for the present climate or considering a potential sea level rise. These results help to determine the necessary levels of protection structures in the short and medium term. However, a single parameter (the maximum water level) is not enough to characterize the hazard and define all the crisis management measures, particularly when water levels exceed the level of protection or when protection structures fail (for example, breaches in levees or dunes). In addition, the accuracy of these estimates decreases in the long term due to: (i) high uncertainties in sea levels beyond 2050 (IPCC, 2019); (ii) the increase in the proportion of high-intensity cyclones worldwide (Masson-Delmotte et al., 2021); and (iii) environmental instability, notably because of geomorphological (e.g., subsidence, coastline retreat) and biological (e.g., degradation of coral reefs and mangroves) changes. These changes modify hydrodynamic and hydrosedimentary processes on the coast both in the long term and during individual events.

With the aim of making progress in the global assessment of coastal hazards in the long term, the guiding principle of this paper is to promote the use of the latest advances in research on changes in metocean events and water levels, while also encouraging the study of other factors whose evolution are more predictable than storm surge and that may be equally important, namely: tidal regimes, geomorphological settings and environmental changes (particularly those modifying hydrodynamic conditions at the coast).

Although water levels are not the only parameter to consider, it is necessary to begin by clarifying the definitions of the different levels to which we will refer regularly. »

### 3 Line-by-Line comments

1. Abstract: It appears that "metocean events" is the main character of your study. Please consider giving a brief definition of what a "metocean event" is in the context of the study.

For clarity, by convention, we will use "metocean events" throughout the document to generically name storms, cyclones, and tsunamis (even if the former have no meteorological components).

2. L12: Perhaps you meant "metocean" instead of "meteocean"? In the existing literature, I can only find reference to "metocean" which refers to the combined effect of the meteorologic and oceanographic conditions. If "metocean" (as currently written in the manuscript) was the term you wanted to introduce, please consider introducing it in this line by incorporating briefly the definition to make its meaning clear (compared to "metocean").

Idem.

3. L27: Please consider adding a few relevant references to the line "Recent research. . .".

We will cite Cazenave and Llovel (2010), Cazenave and Le Cozannet (2013), Hamlington et al. (2020) and Fox-Kemper et al. (2021).

4. L36: What does "very likely" refers to in this context? Same as IPCC terminology?

Yes, the probability is between 90 and 100%.

5. L40: Why ESL is not sufficient to describe the evolution of the coastal hazards? Please consider brief elaboration of the explanation to come, or provide relevant reference or cases where it was found not enough (e.g., Iqigabel et al. 2021 that is cited in L44).

Response provided at the end of the general comments.

6. L46: Please consider adding a connecting line to indicate for which purpose we need to "First, it is necessary to . . .".

Response provided in the general comments.

7. L122: Does "consequence" here means the same as "impacts" as described in IPCC AR5 WG2 report?

Yes.

8. L141: "The application of the proposed method . . ." for which purpose? It appears that something is missing from this line.

OK, the text will be edited as follows:

**« To determine the most relevant scenario and identify the most appropriate time horizon, an exposure and vulnerability analysis and an assessment of the duration of the project are required. These reflections are an essential prerequisite for the application of the proposed method. »**

9. L142-144: This statement is interesting and thought-provoking, please elaborate.

Response provided at the end of the general comments.

10. L184: What would be the 3-maritime facades of France? Perhaps consider adding a bit more somewhere about the coastline of France.

OK, we can improve the localisation of these facades.

11. L190: Pickering et al. 2012 - The impact of future sea-level rise on the European Shelf Tides

OK, thank you for this reference.

12. L201: Is "meteo-oceanic" event is the same as metocean/meteocean event?

Yes, and we will prefer « metocean » throughout the paper.

13. L213-214: What kind of analysis? How about literature review?

We will replace the sentence

« First, the analysis of storm surges computed from the national REFMAR database reveals that they are controlled not only by storm tracks but also by the width of the continental shelf and the presence of shallow waters. »

By :

« **Storm surges are controlled not only by storm characteristics, such as for tropical cyclones (TC) the TC intensity, the distance to the TC eye, the TC heading direction and the TC translation (Hsu et al., 2023), but also by the width of the continental shelf and the presence of shallow waters (Kennedy et al., 2012).** »

In the next paragraph we will refer to Krien et al. (2015) and Krien et al. (2017) to support the fact that « on the islands of the West Indies, the storm surges rarely exceed 3 m ».

14. L229: "maritime facade" is mentioned again here (directly translated from french façade maritime perhaps? it does not seem to exist in English), please elaborate what it means somewhere in the text.

« Facade » is a word also used by English native speakers. **The localisation of these facades on a map will definitely help to understand the text.** Thank you.

15. L231: Please consider providing proper journal/article reference (which exists) instead of a generic website from NOAA.

We will refer to Flather (2001), Rego and Li (2010) and Kennedy et al. (2012).

16. L234: Please consider adding a real example from published literature.

Idem.

17. L247: "should" -> "expected to".

To avoid redundancy with « expected », we propose « may ».

18. L250-252: How do these sentences fit to the current discussion of hazard? Please consider rewriting/revising/deleting.

As indicated in the answers to general comments, biological changes should be taken into account in the assessment of hazard changes.

In complement, we could add in the discussion (L. 581), as indicated in Krien et al. (2017) : « **Moreover, coastal ecosystems such as mangroves, coral reefs or seagrass beds may not be able to adapt to climate change (e.g., Waycott et al., 2009; Wong et al., 2014), which could have large impacts on coastal hazards (e.g., Alongi, 2008; Wong et al., 2014).** »

19. L280: Why French coast was chosen to demonstrate the method?

Response provided in the general comments.

20. Figure 2: Please consider a bit more elaborate caption and add reference to the figure if it is adapted from somewhere else.

OK.

21. Figure 2: Please consider putting different colour for so called "marine facade".



OK, good idea. Thank you.

22. L280-300: I do not understand the objective of the paragraph regarding the GMSL projections. Neither in your equation of ESL (eq 3.) nor in the list presented in L270 there is GMSL present.

OK, you're right. In an earlier version of the paper, this text was positioned at line 144.

Here, we propose « **The choice of the scenario and the time scales should take into account the existence of the high value assets at the considered coasts (coastal cities, port and industrial facilities) and the strong uncertainties about the contributions of ice caps to the rise in water levels (Bamber et al., 2019; Dayan et al., 2021). For these two reasons, we use the SSP5-8.5 scenario.** »

And the rest of the paragraph will be moved to section 2 to explain the high uncertainties in sea level changes.

23. L304: Consider giving a 1-2 line summary of Vousdoukas et al. (2018) framework.

We propose to replace:

« Projections of waves and storm surges were based on hydrodynamic simulations driven by atmospheric forcing from six Coupled Model Intercomparison Project Phase 5 (CMIP5) climate models. »

By:

« **In this framework, baseline values are based on global reanalyses of waves and storm surges. Then CMIP5 models are used to estimate future relative changes to the meteorological tide, and these are applied to estimate the future values. Lastly, meteorological water level changes, astronomical tide and sea level rise are combined to produce the ESL values.** »

24. L305: Are these projections of waves and storm surges published already? Has there been any bias correction done to CMIP5 data?

No bias correction is needed since we are using the CMIP5 simulation results only to obtain relative changes. In addition the results have been validated in the following articles:

Vousdoukas, M.I., Mentaschi, L., Voukouvalas, E., Verlaan, M., Jevrejeva, S., Jackson L. P. & Feyen, L., 2018. Global probabilistic projections of extreme sea levels show intensification of coastal flood hazard. Nat Commun 9, 2360. <https://doi.org/10.1038/s41467-018-04692-w>.

Mentaschi, L., M. I. Vousdoukas, E. Voukouvalas, A. Dosio, and L. Feyen, 2017. Global changes of extreme coastal wave energy fluxes triggered by intensified teleconnection patterns, Geophys. Res. Lett., 44, 2416–2426, doi:10.1002/2016GL072488.

Vousdoukas, M. I., Mentaschi, L., Voukouvalas, E., Verlaan, M., and Feyen, L., 2017. Extreme sea levels on the rise along Europe's coasts. Earth's Future, 5, 304–323. doi:10.1002/2016EF000505.

25. L308-310: Where are these projection coming from? I do not see a reference here. Is it from CMIP 6 project?

As indicated, it is CMIP5 and not CMIP6.

26. Table 2: Please add lon,lat location of the tide gauges. Please also add another column with tidal range.

**Good idea to add latitude and longitude.**

Tidal ranges are presented in 3.1.2. To keep the structure of the section and avoid redundancy, we prefer not to add this information in Table 2.

|                                         | Latitude                | Longitude               | Projection of RSL rise (m) |      |
|-----------------------------------------|-------------------------|-------------------------|----------------------------|------|
|                                         |                         |                         | 2050                       | 2100 |
| Calais                                  | 50.972122801049395      | 1.8400588679271384      | 0.19                       | 0.86 |
| Le Havre                                | 49.485774012966544      | 0.0897840202510471      | 0.19                       | 0.87 |
| Saint-Malo                              | 48.641170797005124      | -<br>2.0313888026241402 | 0.19                       | 0.87 |
| Brest                                   | 48.368792381060274      | -<br>4.4887286031866935 | 0.19                       | 0.83 |
| La Rochelle                             | 46.14879125637811       | -<br>1.1691588857635562 | 0.16                       | 0.76 |
| Saint-Jean-de-Luz                       | 43.39842588942395       | -1.676715829943722      | 0.17                       | 0.79 |
| Port Vendres                            | 42.52411089711506,      | 3.1143835886292806      | 0.16                       | 0.76 |
| Sète                                    | 43.39330679508365       | 3.699492031443802       | 0.16                       | 0.76 |
| Marseille                               | 43.29569227471328       | 5.352448215467127       | 0.17                       | 0.78 |
| Saint-Pierre (Saint-Pierre-et-Miquelon) | 46.786272435631275      | -56.16190646722868      | 0.19                       | 0.83 |
| Pointe-à-Pitre (Guadeloupe)             | 16.23300045952869       | -61.53571250198115      | 0.20                       | 0.90 |
| Cayenne (French Guiana)                 | 4.93572687841612        | -<br>52.340676954198194 | 0.20                       | 0.90 |
| Pointe des Galets (La Réunion)          | -<br>20.936178918145654 | 55.280686667086655      | 0.19                       | 0.92 |
| Papeete (French Polynesia)              | -17.53479287238126      | -<br>149.58674796473545 | 0.20                       | 0.91 |

27. L322: In the "standard classification" are there more than 3 types? Please add a reference to standard classification, like Book of Pugh and Woodworth 2014.

**We will refer to Masselink and Short (1993).**

28. Figure 3: The figure contains an incomplete description. The Mediterranean is missing, so is the other french islands. What is type of the data? How it was generated? Model? Altimetry? Tide gauges? Please provide further detail.

The objective of our article is not to detail as much as possible the quantitative assessment of the different components of the water level. As for the wave set-up, the goal is to provide the order of magnitude.

The map is provided by the SHOM, which produces the reference maritime and coastal geographic information in France. It aims at illustrating tidal ranges along macrotidal coastlines. That's why the information is limited to English Channel and the Atlantic. The other coasts are microtidal or mesotidal.

29. Table 3: Please consider combining Table 3 with Table 2.

To keep the structure of the section, we would prefer not to combine Table 3 with Table 2.

30. L359: Please provide the link for ReefTEMPS and DYNALIT services.

DYNALIT: <https://www.dynalit.fr/> and REEFTEMPS: <https://www.reeftemps.science/>

31. L361: Why infragravity waves with  $H_s \sim 1\text{m}$  can be superimposed on this set-up? Reference?

Bertin et al. (2020) showed that infragravity waves of  $H_s \sim 1.5\text{ m}$  were superimposed to a surge (wind + wave setup) of 0.5 to 1.0 m.

Baumann et al. (2017) showed that IG waves could reach 2 m during storm Hercules.

In Truc Vert, Ruessink (2010) measured IG waves of  $H_s \sim 1.5\text{ m}$  during storm Johanna, he did not provide estimates of wave setup but Nicolae-Lerma et al. (2017) provided estimates of wave setup up to 0.8 m for this storm.

To keep the text short, we propose to add only the reference to Bertin et al. (2020).

32. L363: "This information" -> which information? Which geo-morphological configuration?

« This information confirms » can be replaced by « These observations confirm ».

33. Table 4-5: Are the results taken directly from Vousdoukas et al. (2018) or reanalyzed? It is not clear to me.

As indicated in lines 304, 366 and 386, the results are taken directly from the framework developed by Vousdoukas et al. (2018). The reasons for this choice are explained in the general comments and will be transcribed in the paper.

34. L380: Reference for this claim about Mediterranean? Or is it analyzed somewhere in this manuscript? It is not clear.

**We will refer to Vitousek et al. (2017), since this reference is cited concerning this subject in the introduction.**

35. Why Table 5 and Table 7 is separated?

The idea is to analyse separately mainland France and overseas territories. If you want, we can merge the tables and adapt the texts accordingly.

36. Same question as above for Table 4 and Table 6.

Idem.

37. L405: Repeated, not needed.

OK.

38. Table 8: Please add relevant reference to another column. Since it is a "qualitative" assessment, without reference it does not hold enough validity. Adding reference to each cases will also add values to all the past regional studies that are done over these various regions. Same goes for related text, where there appears to be no references currently (L428-446). In addition, it is not clear how these subjective labels are provided - e.g., Very high, High etc.

The diversity of situations does not really make it possible to set up a calibration and weighting system. Here our method aims to help experts to make a structured judgment on the « surge potential associated with the geomorphological configuration » based on a list of criteria. We agree that experts should also be encouraged to integrate past study results in their judgments. To this end past regional studies should indeed appear in Table 8. Here are the references we propose to cite on the different coastlines considered for our case studies.

For the three metropolitan French facades :

- English Channel – North Sea : Le Gorgeu and Guitonneau (1954), Hequette (2010), Bardet et al. (2011), Haigh et al. (2011), Weisse et al. (2012), Idier et al. (2012), Maspataud et al. (2013), Hamdi et al. (2014), Vousdoukas et al. (2016), Latapy et al. (2017), Vousdoukas et al. (2017), Hamdi et al. (2018), and DREAL Nord Pas-de-Calais (2024)

Bardet, L., Duluc, C.-M., Rebour, V., and L'Her, J.: Regional frequency analysis of extreme storm surges along the French coast, Nat. Hazards Earth Syst. Sci., 11, 1627–1639, <https://doi.org/10.5194/nhess-11-1627-2011>, 2011.

DREAL Nord Pas-de-Calais : Détermination de l'aléa de submersion marine intégrant les conséquences du changement climatique en région Nord – Pas de Calais. Phase 1: Compréhension du fonctionnement du littoral, [https://www.hauts-de-france.developpement-durable.gouv.fr/IMG/pdf/50292\\_-\\_sub\\_npc\\_-\\_phase\\_1\\_-\\_version\\_4.pdf](https://www.hauts-de-france.developpement-durable.gouv.fr/IMG/pdf/50292_-_sub_npc_-_phase_1_-_version_4.pdf), last access: 08 February 2024.

Haigh I., Nicholls R. and Wells N.: Rising sea levels in the English Channel 1900 to 2100. Marit Eng 164(MA2):81–92, 2011.

Hamdi, Y., Bardet, L., Duluc, C.-M., and Rebour, V.: Extreme storm surges: a comparative study of frequency analysis approaches, Nat. Hazards Earth Syst. Sci., 14, 2053–2067, <https://doi.org/10.5194/nhess-14-2053-2014>, 2014.

Hamdi, Y., Garnier, E., Giloy, N., Duluc, C.-M., and Rebour, V.: Analysis of the risk associated with coastal flooding hazards: a new historical extreme storm surges dataset for Dunkirk, France, Nat. Hazards Earth Syst. Sci., 18, 3383–3402, <https://doi.org/10.5194/nhess-18-3383-2018>, 2018.

Hequette A.: Les risques naturels littoraux dans le Nord-Pas-de-Calais, France, VertigO, hors ser. 8, 2010.

Idier, D., Dumas, F., and Muller, H.: Tide-surge interaction in the English Channel, Nat. Hazards Earth Syst. Sci., 12, 3709–3718, <https://doi.org/10.5194/nhess-12-3709-2012>, 2012.

Latapy, A., Arnaud, H., Pouvreau, N., and Weber N.: Reconstruction of sea level changes in Northern France for the past 300 years and their relationship with the evolution of the coastal zone, in: *Coast 2017*, Bordeaux, <https://doi.org/10.13140/RG.2.2.14180.07041>, 2017.

Le Gorgeu, V. and Guitonneau, R. : Reconstruction de la Digue de l'Est à Dunkerque, *Coast. Eng.*, 5, 555–586, <https://icce-ojs-tamu.tdl.org/icce/index.php/icce/article/viewFile/2043/1716>, 1954.

Maspataud A., Ruz M.-H. and Vanhée S.: Potential impacts of extreme storm surges on a low-lying densely populated coastline: the case of Dunkirk area, Northern France. *Nat Hazards* 66:1327–1343, 2013.

Vousdoukas, M., Voukouvalas, E., Annunziato, A., Giardino, A., & Feyen, L.: Projections of extreme storm surge levels along Europe. *Climate Dynamics*, 47, 3171, 3190. <https://doi.org/10.1007/s00382-016-3019-5>, 2016.

Weisse R., von Storch H., Niemeier H.D. and Knaack H.: Changing North Sea storm surge climate: an increasing hazard? *Ocean Coast Manag* 68:58–68, 2012.

Vousdoukas, M. I., Mentaschi, L., Voukouvalas, E., Verlaan, M., & Feyen, L.: Extreme sea levels on the rise along Europe's coasts. *Earth's Future*, 5, 304–323. <https://doi.org/10.1002/2016EF000505>, 2017.

- **Bay of Biscay : Allgeyer et al. (2013), Bertin et al. (2014), Hamdi et al. (2014), Bertin et al. (2015), Hamdi et al. (2015), Bulteau et al. (2015), Vousdoukas et al. (2016) and Vousdoukas et al. (2017), Garnier et al. (2018) and Khan et al. (2023).**

Allgeyer, S., Daubord, C., Hébert, H., Loevenbruck, A., Schindelé, F., and Madariaga, R.: Could a 1755-like tsunami reach the French Atlantic coastline? constraints from twentieth century observations and numerical modeling. *Pure and Applied Geophysics*, 170(9–10), 1415–1431, 2013.

Bertin X., Li K., Roland A., Zhang Y.J., Breilh J.-F. and Chaumillon E.: A modeling-based analysis of the flooding associated with Xynthia, central Bay of Biscay. *Coast Eng* 94:80–89, 2014.

Bertin, X., Li K., Roland A., and Bidlot J.-R.: The contribution of short-waves in storm surges: two case studies in the Bay of Biscay, *Continental Shelf Research*, 96, 1-15, doi:10.1016/j.csr.2015.01.005, 2015.

Bulteau, T., Idier, D., Lambert, J., and Garcin, M.: How historical information can improve estimation and prediction of extreme coastal water levels: application to the Xynthia event at La Rochelle (France), *Nat. Hazards Earth Syst. Sci.*, 15, 1135–1147, <https://doi.org/10.5194/nhess-15-1135-2015>, 2015.

Garnier, E., Ciavola, P., Armaroli, C., Spencer, T., and Ferreira, O.: Historical analysis of storms events: case studies in France, England, Portugal and Italy, *Coast. Eng.*, 134, 10–23, <https://doi.org/10.1016/j.coastaleng.2017.06.014>, 2018.

Hamdi, Y., Bardet, L., Duluc, C.-M., and Rebour, V.: Extreme storm surges: a comparative study of frequency analysis approaches, *Nat. Hazards Earth Syst. Sci.*, 14, 2053–2067, <https://doi.org/10.5194/nhess-14-2053-2014>, 2014.

Hamdi, Y., Bardet, L., Duluc, C.-M., and Rebour, V.: Use of historical information in extreme-surge frequency estimation: the case of marine flooding on the La Rochelle site in France, *Nat. Hazards Earth Syst. Sci.*, 15, 1515–1531, <https://doi.org/10.5194/nhess-15-1515-2015>, 2015.

Khan, M. J. U., Beld, I., Wöppelmann, G., Testut, L., Latapy, A. and Pouvreau, N.: Extension of a high temporal resolution sea level time series at Socoa (Saint-Jean-de-Luz, France) back to 1875. *Earth System Science Data*, 15, 5739–5753. [10.5194/essd-15-5739-2023](https://doi.org/10.5194/essd-15-5739-2023), 2023.

Vousdoukas, M., Voukouvalas, E., Annunziato, A., Giardino, A., and Feyen, L.: Projections of extreme storm surge levels along Europe. *Climate Dynamics*, 47, 3171, 3190. <https://doi.org/10.1007/s00382-016-3019-5>, 2016.

Vousdoukas, M. I., Mentaschi, L., Voukouvalas, E., Verlaan, M., and Feyen, L.: Extreme sea levels on the rise along Europe's coasts. *Earth's Future*, 5, 304–323. <https://doi.org/10.1002/2016EF000505>, 2017.

- **Mediterranean : Ullmann et al. (2007), Fita et al. (2007), Campins et al. (2011), Conte and Lionello (2013), Cavicchia et al. (2014), Androulidakis et al. (2015), Vousdoukas et al. (2016), Romero and Emanuel (2016), Vousdoukas et al. (2017), Muis et al. (2020), Elkut et al. (2021), Patlakas et al. (2021), and Toomey et al. (2022).**

Androulidakis, Y. S., Kombiadou, K. D., Makris, C. V., Baltikas, V. N., and Krestenitis, Y. N.: Storm surges in the Mediterranean sea: Variability and trends under future climatic conditions. *Dynamics of Atmospheres and Oceans*, 71, 56–82. <https://doi.org/10.1016/j.dynatmoce.2015.06.001>, 2015.

Campins, J., Genovés, A., Picornell, M. A., and Jansà, A.: Climatology of Mediterranean cyclones using the era-40 dataset. *International Journal of Climatology*, 31(11), 1596–1614. <https://doi.org/10.1002/joc.2183>, 2011.

Conte, D., and Lionello, P.: Characteristics of large positive and negative surges in the Mediterranean sea and their attenuation in future climate scenarios. *Global and Planetary Change*, 111, 159–173. <https://doi.org/10.1016/j.gloplacha.2013.09.006>, 2013.

Cavicchia, L., Von Storch, H., and Gualdi, S.: A long-term climatology of medicanes. *Climate Dynamics*, 43, 1183, 1195. <https://doi.org/10.1007/s00382-013-1893-7>, 2014.

Elkut, A. E., Taha, M. T., Abu Zed, A. B. E., Eid, F. M., and Abdallah, A. M.: Wind-wave hindcast using modified ECMWF era-interim wind field in the Mediterranean sea. *Estuarine, Coastal and Shelf Science*, 252, 107267. <https://doi.org/10.1016/j.ecss.2021.107267>, 2021.

Fita, L., Romero, R., Luque, A., Emanuel, K., and Ramis, C.: Analysis of the environments of seven Mediterranean tropical-like storms using an axisymmetric, nonhydrostatic, cloud resolving model. *Natural Hazards and Earth System Sciences*, 7, 41, 56. <https://doi.org/10.5194/nhess-7-41-2007>, 2007.

Patlakas, P., Stathopoulos, C., Tsalis, C., and Kallos, G.: Wind and wave extremes associated with tropical-like cyclones in the Mediterranean basin. *International Journal of Climatology*, 41(S1), E1623–E1644. <https://doi.org/10.1002/joc.6795>, 2021.

Romero, R., and Emanuel, K.: Climate change and hurricane-like extratropical cyclones: Projections for north Atlantic polar lows and medicanes based on cmip5 models. *Journal of Climate*, 30(1), 279–299. <https://doi.org/10.1175/JCLI-D-16-0255.1>, 2016.

Toomey, T., Amores, A., Marcos, M., Orfila, A., & Romero, R.: Coastal hazards of tropical-like cyclones over the Mediterranean Sea. *Journal of Geophysical Research: Oceans*, 127, e2021JC017964. <https://doi.org/10.1029/2021JC017964>, 2022.

Ullmann A., Pirazzoli P. A. and Tomasin A.: Sea surges in Camargue: Trends over the 20th century. *Cont Shelf Res* 27:922–934, 2007.

Vousdoukas, M., Voukouvalas, E., Annunziato, A., Giardino, A., and Feyen, L.: Projections of extreme storm surge levels along Europe. *Climate Dynamics*, 47, 3171, 3190. <https://doi.org/10.1007/s00382-016-3019-5>, 2016.

Vousdoukas, M. I., Mentaschi, L., Voukouvalas, E., Verlaan, M., and Feyen, L.: Extreme sea levels on the rise along Europe's coasts. *Earth's Future*, 5, 304–323. <https://doi.org/10.1002/2016EF000505>, 2017.

#### **For overseas coastlines :**

- **Saint-Pierre-et-Miquelon : Catto and Batterson (2011), Han et al. (2012) and Masson (2014)**

Catto N. R., Batterson M. J.: Igor and other hurricane and extratropical transitions in Newfoundland: geomorphologic and landscape impacts. *Geohydro* 2011 2011:1–4, 2011.

Han, G., Ma, Z., Chen, D., deYoung B. and Chen N.: Observing storm surges from space: Hurricane Igor off Newfoundland. *Sci Rep* 2, 1010. <https://doi.org/10.1038/srep01010>, 2012.

Masson, A.: The extratropical transition of Hurricane Igor and the impacts on Newfoundland. *Nat Hazards* 72, 617–632. <https://doi.org/10.1007/s11069-013-1027-x>, 2014.

- **Guadeloupe : Pagney (1991), Zahibo et al. (2007), Dorville and Zahibo (2010), Lin and Chavas (2012), Krien et al. (2015)**

Dorville, J.-F. M. and Zahibo, N.: Hurricane Omar Waves Impact on the West Coast of the Guadeloupe Island, October 2008, *Open Oceanography Journal*, 4, 83–91, 2010.

Krien, Y., Dudon, B., Roger, J., and Zahibo, N.: Probabilistic hurricane-induced storm surge hazard assessment in Guadeloupe, Lesser Antilles, *Nat. Hazards Earth Syst. Sci.*, 15, 1711–1720, <https://doi.org/10.5194/nhess-15-1711-2015>, 2015.

Lin, N. and Chavas, D.: On hurricane parametric wind and applications in storm surge modeling, *J. Geophys. Res.*, 117, D09120, doi:10.1029/2011JD017126, 2012.

Pagney, F.: Genese et dynamique de l'ouragan Hugo sur la Guadeloupe, *Ann. Geogr.*, 100, 152–165, 1991.

Zahibo, N., Pelinovsky, E., Talipova, T., Rabinovich, A., Kurkin, A., and Nikolkina, I.: Statistical analysis of cyclone hazard for Guadeloupe, Lesser Antilles, *Atmos. Res.*, 84, 13–29, 2007.

- **French Guiana : Gratiot et al. (2007), Chevalier et al. (2008), Thiéblemont et al. (2023)**

Chevalier C., Froidefond J.-M. and Devenon J.-L.: Numerical analysis of the combined action of littoral current, tide and waves on the suspended mud transport and on turbid plumes around French Guiana mudbanks, *Continental Shelf Research*, Volume 28, Issues 4–5, Pages 545-560, ISSN 0278-4343, <https://doi.org/10.1016/j.csr.2007.09.011>, 2008.

Gratiot N., Gardel A. and Anthony E. J.: Trade-wind waves and mud dynamics on the French Guiana coast, South America: Input from ERA-40 wave data and field investigations, *Marine Geology*, Volume

236, Issues 1–2, 2007, Pages 15-26, ISSN 0025-3227, <https://doi.org/10.1016/j.margeo.2006.09.013>, 2007.

Thiéblemont, R., Le Cozannet, G., D’Anna, M. et al.: Chronic flooding events due to sea-level rise in French Guiana. *Sci Rep* 13, 21695. <https://doi.org/10.1038/s41598-023-48807-w>, 2023.

- **La Réunion : Lecacheux et al. (2012), Sahal and Morin (2012), Quentel et al. (2013), Allgeyer et al. (2017)**

Allgeyer, S., Quentel, É., Hébert, H. et al.: Tsunami Hazard in La Réunion Island (SW Indian Ocean): Scenario-Based Numerical Modelling on Vulnerable Coastal Sites. *Pure Appl. Geophys.* 174, 3123–3145. <https://doi.org/10.1007/s00024-017-1632-9>, 2017.

Quentel, E., Loevenbruck, A., Hébert, H., and Allgeyer, S.: Tsunami hazard in La Réunion island from numerical modeling of historical events, *Nat. Hazards Earth Syst. Sci. Discuss.*, 1, 1823–1855, <https://doi.org/10.5194/nhessd-1-1823-2013>, 2013.

Lecacheux, S., Pedreros, R., Le Cozannet, G., Thiebot, J., De La Torre, Y. and Bulteau, T.: A method to characterize the different extreme waves for islands exposed to various wave regimes: a case study devoted to Reunion Island, *Nat. Hazards and Earth Syst. Sci.*, 12(7), 2425-2437, 2012.

Sahal, A. and Morin, J.: Effects of the October 25, 2010, Mentawai tsunami in La Réunion Island (France): observations and crisis management. *Nat Hazards* 62, 1125–1136. <https://doi.org/10.1007/s11069-012-0136-2>, 2012.

- **French Polynesia : Pirazzoli and Montaggioni (1988), Aubanel et al. (1999), Larrue and Chiron (2010), Webb and Kench (2010), Becker et al. (2012), Yates et al. (2013), Le Cozannet et al. (2013), Martinez-Asensio et al. (2019) and Barriot et al. (2023)**

Aubanel, A., Marquet, N., Colombani, J.M., and Salvat, B.: Modifications of the shore line in the Society islands (French Polynesia). *Ocean and Coastal Management*, 42, 419–438, 1999.

Barriot, J-P., Zhang, F., Ducarme, B., Wöppelmann, G., André, G. & Gabillon, A.: A database for sea-level monitoring in French Polynesia. *Geoscience Data Journal*, 10, 368–384. Available from: <https://doi.org/10.1002/gdj3.172>, 2023.

Becker, M., Meyssignac, B., Letetrel, C., Llovel, W., Cazenave, A., and Delcroix, T.: Sea level variations at tropical Pacific islands since 1950. *Global and Planetary Change*, 80–81, 85–98. doi: 10.1016/j.gloplacha.2011.09.004, 2012.

Larrue S. and Chiron T.: « Les îles de Polynésie française face à l’aléa cyclonique », *Vertigo*, Volume 10 Numéro 3 URL : <http://journals.openedition.org/vertigo/10558> ; DOI : <https://doi.org/10.4000/vertigo.10558>, 2010.

Le Cozannet, G., Garcin, M., Petitjean, L., Cazenave, A., Becker, M., Meyssignac, B., Walker, P., Devilliers, C., Le Brun, O., Lecacheux, S., Baills, A., Bulteau, T. Yates, M., and Wöppelmann, G.: Exploring the relation between sea level rise and shoreline erosion using sea level reconstructions: an example in French Polynesia. *Journal of Coastal Research* 65(sp2), 2137-2142. <https://doi.org/10.2112/SI65-361.1>, 2013.



Martinez-Asensio, A., Wöppelmann, G., Ballu, V., Becker, M., Testut, L., Magnan, A.K. et al.: Relative Sea-level rise and the influence of vertical land motion at tropical Pacific Islands. *Global and Planetary Change*, 176, 132–143. <https://www.sciencedirect.com/science/article/pii/S0921818118306751>, 2019.

Pirazzoli, P. A. and Montaggioni, L. F.: Holocene sea level changes in French Polynesia, *Paleogeography, paleoclimatology paleoecology*, 68 (2-4), 153-175, 1988.

Webb, A.P. and Kench, P.S.: The dynamic response of reef islands to sea level rise: Evidence from multi-decadal analysis of island change in the Central Pacific. *Global and Planetary Change*, 72, 234–246, 2010.

Yates M., Le Cozannet G., Garcin, M., Salai, E. and Walker, P.: Multi-decadal shoreline change on Manihi and Manuae, French Polynesia. *Journal of Coastal Research*, 2013.

39. Section 3.2.3: How these factors are taken into account? Any subjective or objective comparison?

In the proposed method, we suggest checking that such factors (changes in the swell climate related to the decrease in seasonal sea ice extent, and coral reefs degradation) are not likely to significantly change the hydraulic conditions in the long term. It is difficult to make comparisons with the influence of other factors (e.g. geomorphological configuration, reference metocean event, tidal range, frequency and intensity of extreme climate events).

40. Why Table 9 and 10 are separated? It seems the tide gauge stations are now aggregated. Why it is so?

The goal is to avoid too much information in the same table.

The aggregated data provide regional conclusions. If conclusions are sought at a more local scale, as explained in Section 4, it is necessary to extend the investigations.

41. It is not very clear how in Table 9 and 10, the "important" and "most important" labels are applied. Are they coming from assessment of available literature?

Indeed, it would be better to qualify the factors by the terms "slightly detrimental ", " detrimental " and "highly detrimental".

**As for Table 8, in Table 9 and 10 the diversity of the situations does not really make it possible to set up a calibration and weighting system.**

**In our method, each factor should not be considered independently. On the contrary, the joint effects of the different factors should be assessed to understand the dynamics of the system.**

**This is the main reason why our method can be called « systemic », in reference to the study of a system (as you indicated, in our case, the coast). However, our method should not be called « systematic ». Whereas it provides a framework for analysis that incorporates multiple factors, the expert in charge of the study of a particular site should nevertheless form his own opinion by considering these factors together. In summary, our method aims to help experts to make a structured judgment.**

**We propose to insert this explanation at the end of the presentation of the method (line 279).**

42. L614: I believe GMSL is not taken into account here as global sense, rather it was included into RSL. Is it?

**You're right.**

43. L665: How the impact of sea level changes on human communities are evaluated in paper? I do not see it. I do not also see where the "anthropogenic structures" are considered, and how it was considered.

**Anthropogenic structures are mentioned explicitly in section 4.1 for estuaries and polar regions. We can also mention them for sandy coasts.**

## Additional references

Alongi, D. M.: Mangrove forests: resilience, protection from tsunamis, and response to global climate change, *Estuar. Coast. Shelf S.*, 76, 1–13, 2008.

Aucan J., Hoeke R. K., Storlazzi C. D., Stopa J., Wandres M., and Lowe R.: Waves do not contribute to global sea-level rise. *Nature Climate Change*, 9(1):2–2, December 2018.

Bertin X., Martins K., de Bakker A., Chataigner T., Guérin T., et al.: Energy Transfers and Reflection of Infragravity Waves at a Dissipative Beach Under Storm Waves. *Journal of Geophysical Research. Oceans*, 125 (5), pp.e2019JC015714, 2020.

Brivois O., Idier D., Thiébot J., Castelle B., Le Cozannet G., Calvete D.: On the use of linear stability model to characterize the morphological behaviour of a double bar system. Application to Truc Vert beach (France). *CR Geosci* 344:277–287. <https://doi.org/10.1016/j.crte.2012.02.004>, 2012.

Cazenave, A. and Llovel, W.: Contemporary sea level rise. *Ann. Rev. Marine Sci.* 2, 145–173, 2010.

Cazenave, A. and Le Cozannet, G.: Sea level rise and its coastal impacts, *Earth's Future*, 2, 15–34. doi:10.1002/2013EF000188, 2013.

Flather, R.A.: Storm surges. In: Steele, J., Thorpe, S., Turekian, K. (Eds.), *Encyclopedia of Ocean Sciences*. Academic, San Diego, California, pp.2882–2892, 2001.

Formentin, S.M. and Zanuttigh, B.: A new method to estimate the overtopping and overflow discharge at over-washed and breached dikes. *Coast. Eng.*, 140, 240–256. <https://doi.org/10.1016/j.coastaleng.2018.08.002>, 2018.

Fox-Kemper, B. et al., 2021. Ocean, cryosphere and sea level change. In IPCC AR6 (eds Fox-Kemper, B. et al.) 1211–1362. Cambridge University Press.

Gomes da Silva, P., Coco, G., Garnier, R., Klein, A.H.: On the prediction of runup, setup and swash on beaches. *Earth-Sci. Rev.* 204, 103148. <http://dx.doi.org/10.1016/j.earscirev.2020>, 2020.

Hamlington, B. D., Gardner, A. S., Ivins, E., Lenaerts, J. T. M., Reager, J. T., Trossman, D. S., et al.: Understanding of contemporary regional sea-level change and the implications for the future. *Reviews of Geophysics*, 58, e2019RG000672. <https://doi.org/10.1029/2019RG000672>, 2020.

Hsu, C.-E., Serafin, K. A., Yu, X., Hegermiller, C. A., Warner, J. C., and Olabarrieta, M.: Total water levels along the South Atlantic Bight during three along-shelf propagating tropical cyclones: relative

contributions of storm surge and wave runup, *Nat. Hazards Earth Syst. Sci.*, 23, 3895–3912, <https://doi.org/10.5194/nhess-23-3895-2023>, 2023.

Idier D., Bertin X., Thompson P., and Pickering M. D.: Interactions between mean sea level, tide, surge, waves and flooding: Mechanisms and contributions to sea level variations at the coast. *Surveys in Geophysics*, 40(6):1603–1630, 2019.

Igigabel, M., Nédélec, Y., Bérenger, N., Flouest, N., Bernard, A., Chassé, P., et al.: Guidelines for Analysing Coastal Flood Protection Systems After a Submersion. *Water* 14, 15. doi:10.3390/w14010015, 2022.

IPCC: IPCC Special Report on the Ocean and Cryosphere in a Changing Climate [H.- O. Pörtner, D.C. Roberts, V. Masson-Delmotte, P. Zhai, M. Tignor, E. Poloczanska, K. Mintenbeck, M. Nicolai, A. Okem, J. Petzold, B. Rama, N. Weyer (eds.)]. Available online : <https://www.ipcc.ch/srocc/> (accessed on 12 January 2024), 2019.

Kennedy, A.B., Westerink, J.J., Smith, J.M., Hope, M.E., Hartman, M., Taflanidis, A.A., Tanaka, S., Westerink, H., Cheung, K.F., Smith, T., Hamann, M., Minamide, M., Ota, A., Dawson, C.: Tropical cyclone inundation potential on the Hawaiian Islands of Oahu and Kauai. *Ocean Model.* 52–53, 54–68. <http://dx.doi.org/10.1016/j.ocemod.2012.04.009>, 2012.

Krien, Y., Dudon, B., Roger, J., and Zahibo, N.: Probabilistic hurricane-induced storm surge hazard assessment in Guadeloupe, Lesser Antilles, *Nat. Hazards Earth Syst. Sci.*, 15, 1711–1720, <https://doi.org/10.5194/nhess-15-1711-2015>, 2015.

Krien, Y., Dudon, B., Roger, J., Arnaud, G., and Zahibo, N.: Assessing storm surge hazard and impact of sea level rise in the Lesser Antilles case study of Martinique, *Nat. Hazards Earth Syst. Sci.*, 17, 1559–1571, <https://doi.org/10.5194/nhess-17-1559-2017>, 2017.

Lange, A.M.Z., Fiedler, J.W., Becker, J.M., Merrifield, M.A., Guza, R.T.: Estimating runup with limited bathymetry. *Coast. Eng.*, 172, 104055, 2021.

Masselink, G. and Short, A. D.: "The effect of tidal range on beach morphodynamics and morphology: a conceptual beach model". *Journal of Coastal Research*. 9 (3): 785–800. ISSN 0749-0208, 1993.

Masson-Delmotte, V., Zhai, P., Pirani, A., Connors, S. L., Péan, C., Berger, S., Caud, N., Chen, Y., Goldfarb, L., Gomis, M. I., Huang, M., Leitzell, K., Lonnoy, E., Matthews, J. B. R., Maycock, T. K., Waterfield, T., Yelekçi, O., Yu, R., and Zhou, B.: Climate Change 2021: The Physical Science Basis, Contribution of Working Group I to the Sixth Assessment Report of the Intergovernmental Panel on Climate Change, [https://www.ipcc.ch/report/ar6/wg1/downloads/report/IPCC\\_AR6\\_WGI\\_TS.pdf](https://www.ipcc.ch/report/ar6/wg1/downloads/report/IPCC_AR6_WGI_TS.pdf), 2021.

Muis, S., Apecechea, M. I., Dullaart, J., de Lima Rego, J., Madsen, K. S., Su, J., et al.: A high-resolution global dataset of extreme sea levels, tides, and storm surges, including future projections. *Frontiers in Marine Science*, 7, 263. <https://doi.org/10.3389/fmars.2020.00263>, 2020.

Pickering M.D., Wells N.C., Horsburgh K.J., Green J.A.M.: The impact of future sea-level rise on the European Shelf tides. *Continental Shelf Research*, Volume 35, 2012, Pages 1-15, ISSN 0278-4343, <https://doi.org/10.1016/j.csr.2011.11.011>, 2012.

Rego, J.L., Li, C.: Nonlinear terms in storm surge predictions: effect of tide and shelf geometry with case study from Hurricane Rita. *J. Geophys. Res.* 115, C06020, 2010.

Ruggiero, P., Komar, P.D., McDougal, W.G., Marra, J.J., Beach, R.A.: Wave runup, extreme water levels and erosion properties backing beaches. *J. Coast. Res.*, 17, 407–419, 2001.

Stephens, S.A., Coco, G., Bryan, K.R.: Numerical simulations of wave setup over barred beach profiles: Implications for predictability. *J. Waterw. Port Coast. Ocean Eng.* 137 (4), 175–181. [http://dx.doi.org/10.1061/\(ASCE\)WW.1943-5460.0000076](http://dx.doi.org/10.1061/(ASCE)WW.1943-5460.0000076), 2011.

Stockdon, H.F., Holman, R.A., Howd, P.A., Sallenger, A.H.: Empirical parameterization of setup, swash, and runup. *Coast. Eng.* 53, 573–588. <https://doi.org/10.1016/j.coastaleng.2005.12.005>, 2006.

Thiébot J., Idier D., Garnier R., Falquès A., Ruessink G.: The influence of wave direction on the morphological response of a double sandbar system. *Cont Shelf Res* 32:71–85. <https://doi.org/10.1016/j.csr.2011.10.014>, 2012.

van Ormondt, M., Roelvink D., and van Dongeren A.: "A Model-Derived Empirical Formulation for Wave Run-Up on Naturally Sloping Beaches" *Journal of Marine Science and Engineering* 9, no. 11: 1185. <https://doi.org/10.3390/jmse9111185>, 2021.

Vitousek S., Barnard P. L., Fletcher C. H., Frazer N., Erikson L., and Storlazzi C. D.: Doubling of coastal flooding frequency within decades due to sea-level rise. *Scientific Reports*, 7(1), 2017.

Waycott, M., Duarte, C. M., Carruthers, T. J. B., Orth, R. J., Dennison, W. C., Olyarnik, S., Calladine, A., Fourqurean, J. W., Heck, K. L., Hughes, A. R., Kendrick, G. A., Kenworthy, W. J., Short, F. T., and Williams, S. L.: Accelerating loss of seagrasses across the globe threatens coastal ecosystems, *P. Natl. Acad. Sci. USA*, 106, 12377–12381, 2009.

Wong, P. P., Losada, I. J., Gattuso, J.-P., Hinkel, J., Khattabi, A., K. L. McInnes, Saito, Y., and Sallenger, A.: Coastal systems and low-lying areas, in: *Climate Change 2014: Impacts, Adaptation, and Vulnerability, Part A: Global and Sectoral Aspects, Contribution of Working Group II to the Fifth Assessment Report of the Intergovernmental Panel on Climate Change*, edited by: Field, C. B., Barros, V. R., Dokken, D. J., Mach, K. J., Mastrandrea, M. D., Bilir, T. E., Chatterjee, M., Ebi, K. L., Estrada, Y. O., Genova, R. C., Girma, B., Kissel, E. S., Levy, A. N., MacCracken, S., Mastrandrea, P. R., and White, L. L., Cambridge University Press, Cambridge, UK and New York, NY, USA, 361–409, 2014.

#### **References cited in this document that will not be included in the paper**

Baumann J., Chaumillon E., Bertin X., Schneider J.-L., Guillot B., Schmutz M. : Importance of infragravity waves for the generation of washover deposits, *Marine Geology*, Volume 391, Pages 20-35, ISSN 0025-3227, <https://doi.org/10.1016/j.margeo.2017.07.013>, 2017.

Nicolae-Lerma A., Pedreros R., Robinet A., Sénéchal N.: Simulating wave setup and runup during storm conditions on a complex barred beach, *Coastal Engineering*, Volume 123, Pages 29-41, ISSN 0378-3839, <https://doi.org/10.1016/j.coastaleng.2017.01.011>, 2017.

Ruessink, B. G.: Observations of turbulence within a natural surf zone. *Journal of Physical Oceanography* 40, 2696–2712, 2010.
